## Correction

**Correction: Changes in the cellular immune system and circulating inflammatory markers of stroke patients****Chao Jiang<sup>1,2,\*</sup>, Weixia Kong<sup>3,\*</sup>, Yuejuan Wang<sup>1</sup>, Wendy Ziai<sup>2,4</sup>, Qingwu Yang<sup>5</sup>, Fangfang Zuo<sup>1</sup>, Fangfang Li<sup>1</sup>, Yali Wang<sup>1</sup>, Hongwei Xu<sup>6</sup>, Qian Li<sup>2</sup>, Jie Yang<sup>2</sup>, Hong Lu<sup>7</sup>, Jiewen Zhang<sup>8</sup> and Jian Wang<sup>1,2</sup>**<sup>1</sup>Department of Neurology, The Fifth Affiliated Hospital of Zhengzhou University, Zhengzhou, Henan, China<sup>2</sup>Department of Anesthesiology/Critical Care Medicine, Johns Hopkins University, School of Medicine, Baltimore, MD, USA<sup>3</sup>Department of Ultrasonography, The Fifth Affiliated Hospital of Zhengzhou University, Zhengzhou, Henan, China<sup>4</sup>Department of Neurology, Johns Hopkins University, School of Medicine, Baltimore, MD, USA<sup>5</sup>Department of Neurology, Xinqiao Hospital, Third Military Medical University, Chongqing, China<sup>6</sup>Department of Radiology, The Fifth Affiliated Hospital of Zhengzhou University, Zhengzhou, Henan, China<sup>7</sup>Department of Neurology, The First Affiliated Hospital of Zhengzhou University, Zhengzhou, Henan, China<sup>8</sup>Department of Neurology, People's Hospital of Zhengzhou University, Zhengzhou, Henan, China

\*These authors have contributed equally to this work

**Published:****Copyright:** © 2023 Jiang et al. This is an open access article distributed under the terms of the [Creative Commons Attribution License](#) (CC BY 3.0), which permits unrestricted use, distribution, and reproduction in any medium, provided the original author and source are credited.

**This article has been corrected:** After carefully checking the raw data, the authors found that incorrect images from the pre-experimental flow cytometry data were used as the 16 images in Figure 2. Furthermore, the author wrongly labeled the X and Y axes in the panels of the first three rows of Figure 2. The corrected Figure 2, produced using the original data, is shown below. The authors also clarify that the NSFC (81301006) or the NIH grants did not support this work. The authors declare that these corrections do not change the results or conclusions of this article.

Original article: Oncotarget. 2017; 8:3553–3567. <https://doi.org/10.18632/oncotarget.12201>

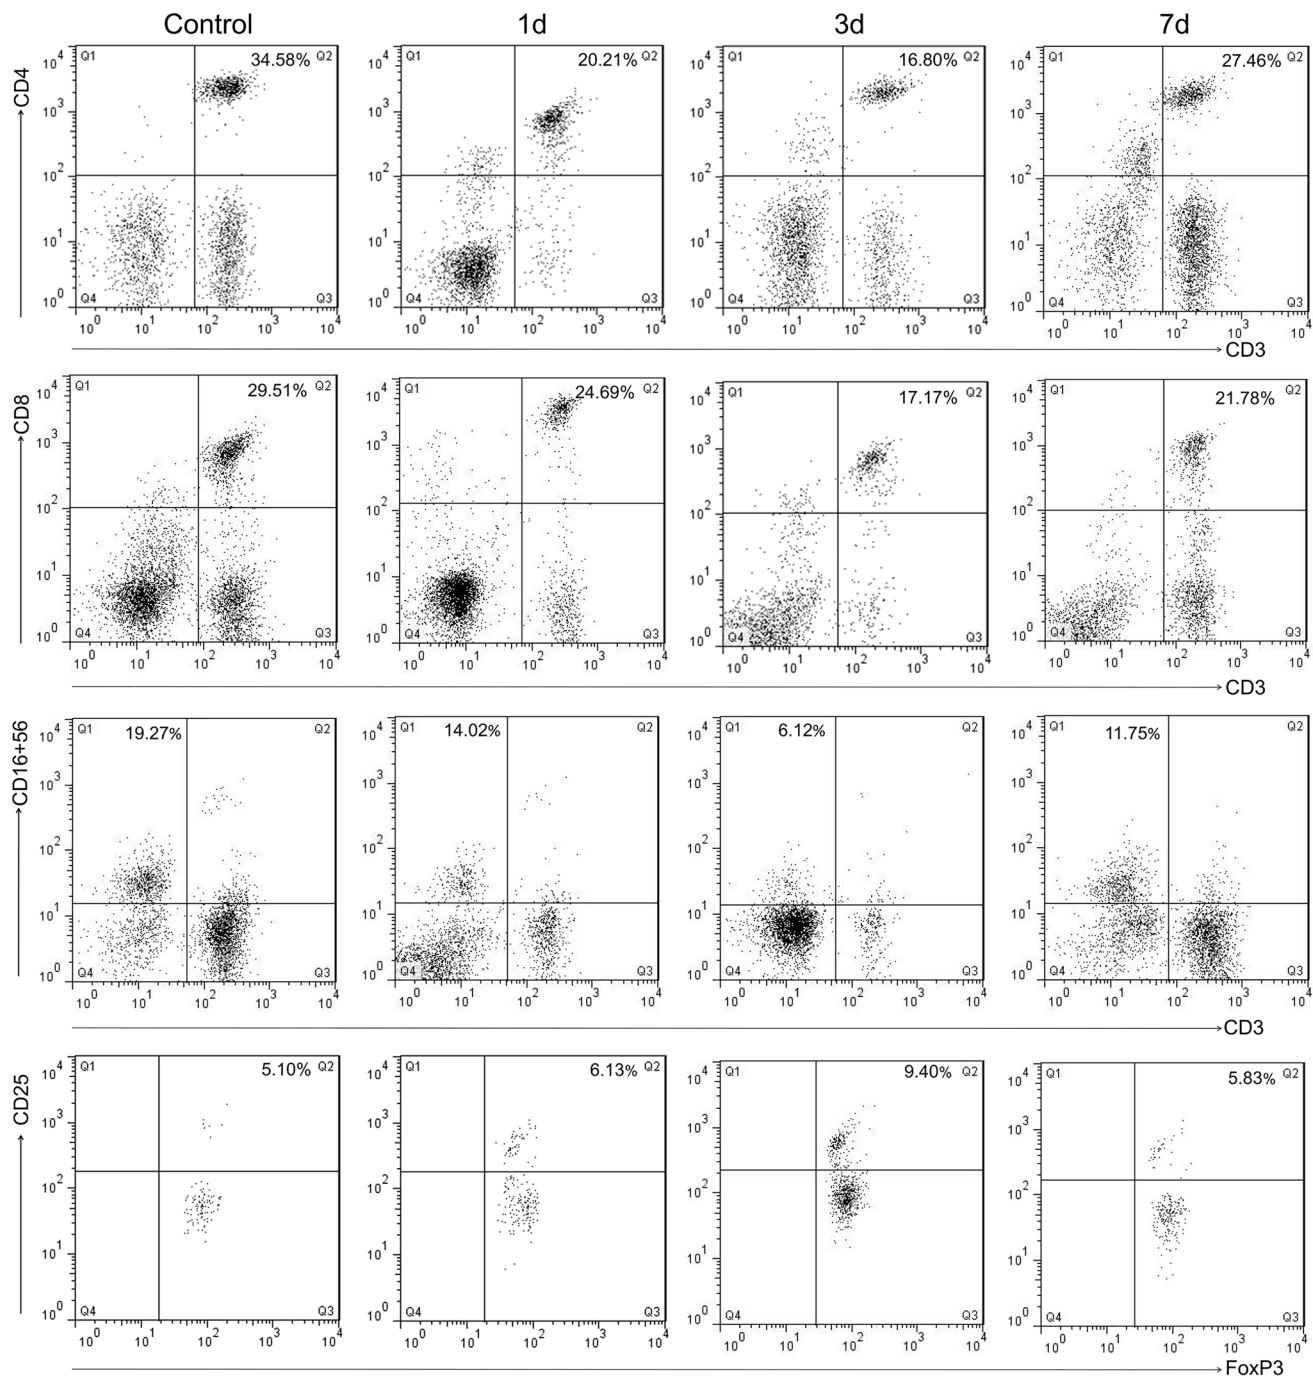

**Figure 2: Representative flow cytometric analyses of blood lymphocyte subpopulations in control subjects and in patients with ischemic stroke on days 1, 3 and 7: Th cells (CD3<sup>+</sup>CD4<sup>+</sup>), cytotoxic T cells (CD3<sup>+</sup>CD8<sup>+</sup>), NK cells (CD16<sup>+</sup>CD56<sup>+</sup>), and Treg cells (CD4<sup>+</sup>CD25<sup>+</sup>FoxP3<sup>+</sup>).**
